# Supplementary material for: Fabrication of a novel nanofiltration membrane using an Mg–Fe layered double hydroxide for dye/salt separation
Source: Royal Society of Chemistry journal article supplement (doi:10.1039/d4ra03366c), 2024-01-01
Supplement: d4ra03366c1.pdf [file d4ra03366c1.pdf]

## Supporting information for

# Fabrication Novel Nanofiltration Membrane using Mg-Fe Layered Double Hydroxide for dye/salt separation

Xiuzhen Wei<sup>1\*</sup>; Zelong Chen<sup>1</sup>; Mengjia He<sup>1</sup>; Liangliang Xu<sup>1</sup>; Yue Li<sup>1</sup>; Jia Yang<sup>2</sup>;  
Xuekang Zhang<sup>1</sup>; Xianghao Zhang<sup>1</sup>; Ze Wang<sup>1</sup>, Shiyu Cao<sup>1</sup>, Qinghua Zhou<sup>1,\*</sup>;  
Bingjun Pan<sup>1\*</sup>

<sup>1</sup>College of Environment, Zhejiang University of Technology, Hangzhou,  
310014, China

<sup>2</sup>Ninghai Society of Environmental Science and Technology, Ningbo, Zhejiang,  
315600, China

---

\* Corresponding author, Xiuzhen Wei College of Environment, Zhejiang University of Technology, E-mail: xzwei@zjut.edu.cn

\* Corresponding author, Qinghua Zhou College of Environment, Zhejiang University of Technology, E-mail: qhzhou@zjut.edu.cn

\* Corresponding author, Bingjun Pan College of Environment, Zhejiang University of Technology, E-mail: bjpan@zjut.edu.cn.

---

## 1. NF membrane preparation condition optimization

1 The influence of membrane preparation conditions on the membrane performance  
2 was studied. In order to obtain NF membrane with optimal separation performance,  
3 the concentration of PIP, TMC, Mg-Fe LDH, heat treatment time, and heat treatment  
4 temperature were optimized based on the permeation flux and rejection rate for 1000  
5  $\text{mg}\cdot\text{L}^{-1}$   $\text{Na}_2\text{SO}_4$  solution.

### 6 1.1 Element mapping images of Mg-Fe LDH

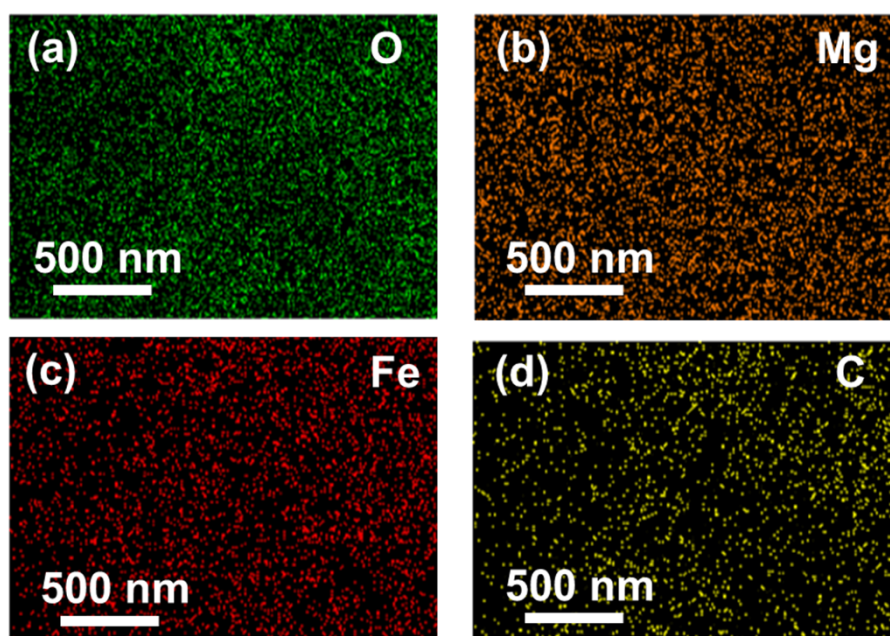

7  
8 **Fig. S1** (a) O, (b) Mg, (c) Fe, and (d) C element mapping images of Mg-Fe LDH  
9

### 10 1.2 FT-IR spectra of Mg-Fe LDH

11

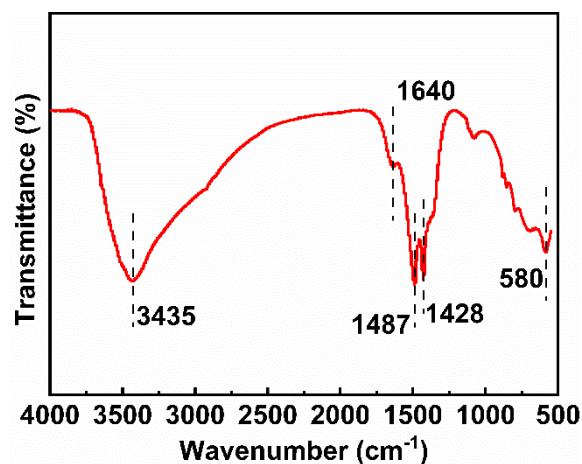

Fig. S2 FT-IR spectra of Mg-Fe LDH

12  
13  
14

### 15 1.3 Wide-scan XPS analysis spectra of different NF membranes

16

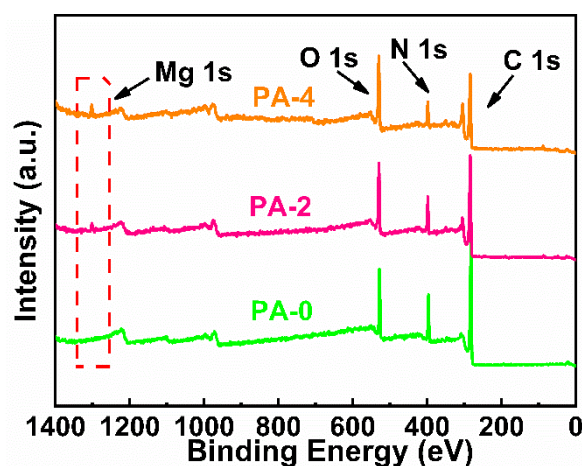

Fig. S3 Wide-scan XPS analysis spectra of different NF membranes

17  
18  
19

### 20 1.4 The effect of PIP concentration

21 PIP concentration will directly affect the thickness of the selective layer. The effect  
 22 of aqueous PIP concentration on NF separation performance was investigated firstly  
 23 and the results were shown in Fig. S4. TMC concentration was fixed at 0.15 wt%,  
 24 Mg-Fe LDH concentration was 0.1 wt%, heat treatment temperature was 60 °C and  
 25 heat treatment time was 10 min when PIP concentration was changed. As shown in  
 26 Fig. S4, the permeation flux of Mg-Fe LDH modified NF membrane for Na<sub>2</sub>SO<sub>4</sub>

27 gradually decreases with the increase of the PIP concentration, while the rejection rate  
28 for  $\text{Na}_2\text{SO}_4$  increased continuously. With the increase of PIP concentration, the  
29 number of PIP molecules fixed into the selective layer increased due to TMC  
30 concentration being fixed, the effective thickness of the selective layer increases  
31 correspondingly which led to the decrease of permeation flux and the increase of  
32 rejection rate. Considering the permeation flux and rejection rate of the NF membrane,  
33 the optimal concentration of PIP in this study was chosen as 0.3 wt%.  
34

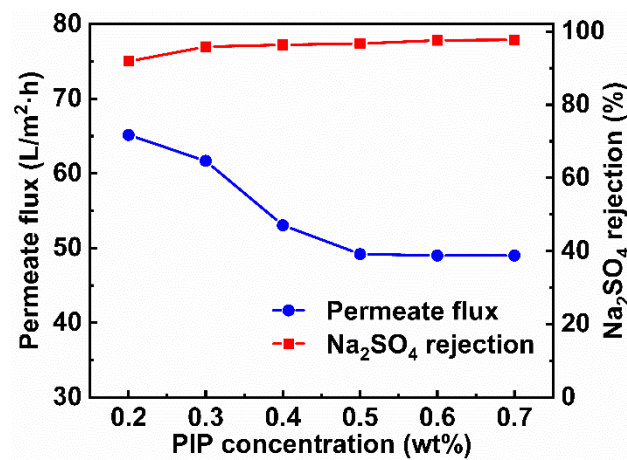

35  
36 **Fig. S4** Effect of PIP concentration on Mg-Fe LDH modified NF membrane  
37 performance.

### 38 1.5 The effect of TMC concentration

39 TMC concentration will directly determine the compactness of the selective layer.  
40 When Mg-Fe LDH concentration was fixed at 0.1 wt%, PIP concentration was 0.3  
41 wt%, heat treatment temperature was 60 °C and heat treatment time was 10 min, the  
42 effect of TMC concentration on NF separation performance was investigated and the  
43 results were shown in Fig. S5. As shown in Fig. S5, when the TMC concentration was  
44 lower than 0.15 wt%, the permeation flux of Mg-Fe LDH modified NF membrane to  
45 the  $\text{Na}_2\text{SO}_4$  solution increased with TMC concentration increase and the salt rejection  
46 rate kept relatively stable. However, when the TMC concentration range in 0.15-0.25  
47 wt%, the permeation flux decreases gradually accompanied by the rejection rate  
48 increase slightly. When TMC concentration was higher than 0.25 wt%, the

49 permeation flux increases obviously, and the rejection rate decreases sharply. If the  
50 concentration of TMC was lower than 0.15 wt%, the reaction was not complete and  
51 the crosslinking rate of the functional layer was not good. Along with the addition of  
52 TMC concentration, the crosslinking rate of the functional layer gets better, the  
53 surface of the composite layer becomes rougher. As a result, the contacting area of the  
54 membrane and water was larger, which promotes the mass transfer of water<sup>[1]</sup>. As  
55 TMC concentration increases (higher than 0.15 wt%), the cross-linking degree of the  
56 functional layer increases which leads to increases in rejection rate and the decrease  
57 of permeation flux. However, if TMC concentration was too high (higher than 0.25  
58 wt%), the interfacial polymerization reaction became too fast, the formed cross-  
59 linking functional layer will relatively loose and the cross-linking structure presents  
60 some defects. Some unreacted acyl chloride groups will hydrolyze to carboxyl groups,  
61 which causes the permeate flux of the membrane to increase and improves the  
62 hydrophilicity of the membrane<sup>[2]</sup>.  
63

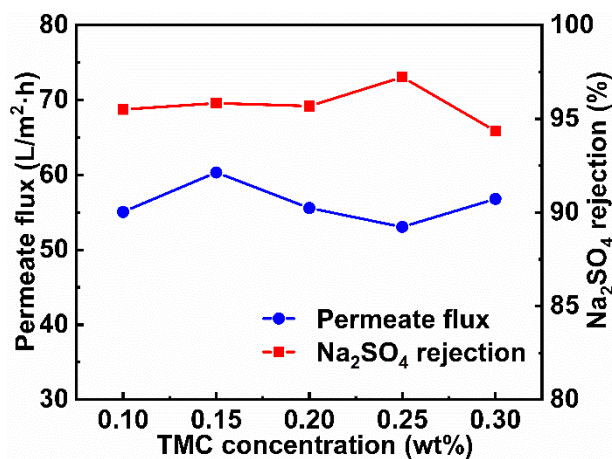

64  
65 **Fig. S5** Effect of TMC concentration on Mg-Fe LDH modified NF membrane  
66 performance

### 67 1.6 The effect of Mg-Fe LDH concentration

68 The presenting of nanoparticles LDH will affect the morphology and structure of  
69 NF membranes. The effect of Mg-Fe LDH concentration on NF separation  
70 performance was investigated when PIP concentration was 0.3 wt%, TMC

71 concentration was 0.15 wt%, heat treatment temperature was 60 °C, heat treatment  
72 time was 10 min. As it can be seen from Fig.S6, the permeation flux of modified NF  
73 membrane increases with Mg-Fe LDH concentration increase very obviously, and the  
74 rejection rate for Na<sub>2</sub>SO<sub>4</sub> decreases slightly. The flux improvement was contributed to  
75 the addition of Mg-Fe LDH to provide additional channels for water molecule  
76 transportation. At the same time, the hydrophilicity of the NF membrane was  
77 improved obviously due to Mg-Fe LDH molecules having abundant hydroxyl groups,  
78 which can promote and increase the absorption of water molecules on the NF  
79 membrane surface<sup>[3]</sup>. However, accompanied by an LDH loading increase, the  
80 rejection rate of the membrane decreased slightly, which may be due to LDH  
81 providing an additional transport channel and forming some defects in the selective  
82 layer. Considering the permeation flux and rejection rate of the NF membrane, the  
83 optimized Mg-Fe LDH concentration was chosen as 0.1 wt%.

84

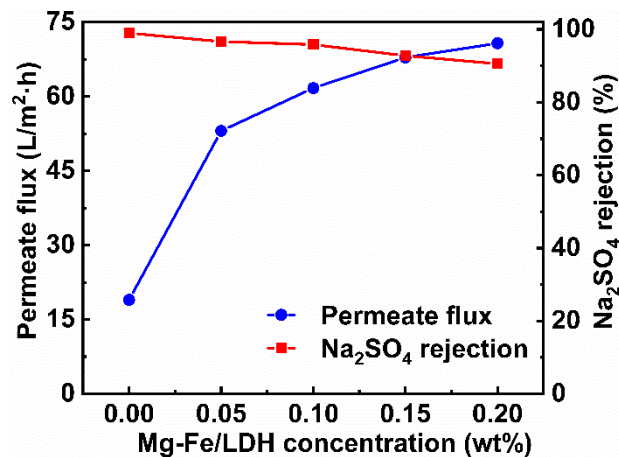

85

86

**Fig. S6** Effect of Mg-Fe LDH concentration on NF membrane performance

### 87 1.7 Effect of heat treatment temperature

88 When Mg-Fe LDH concentration was fixed at 0.1 wt%, PIP concentration was 0.3  
89 wt%, TMC concentration was 0.15 wt%, and the heat treatment time was 10 min, the  
90 effect of heat treatment temperature on NF membrane separation performance was  
91 investigated and the results are shown in Fig. S7. With the increase of the heat

92 treatment temperature, the permeation flux of the NF membrane decreases gradually,  
93 and the rejection rate increase firstly and then decreases slowly. To some degree, the  
94 increase of temperature can improve interfacial polymerization reaction, which leads  
95 to the cross-linking degree of selective functional layer increase and makes the  
96 selective layer denser. However, if the temperature was too high, some chemical  
97 bonds and hydrogen bonds of the cross-linking selective layer will break, and some  
98 defects will be formed, which lead to the reduction of the rejection rate. Considering  
99 the permeate flux and rejection rate of the NF membrane, the heat treatment  
100 temperature was fixed at 60°C in the following study.

101

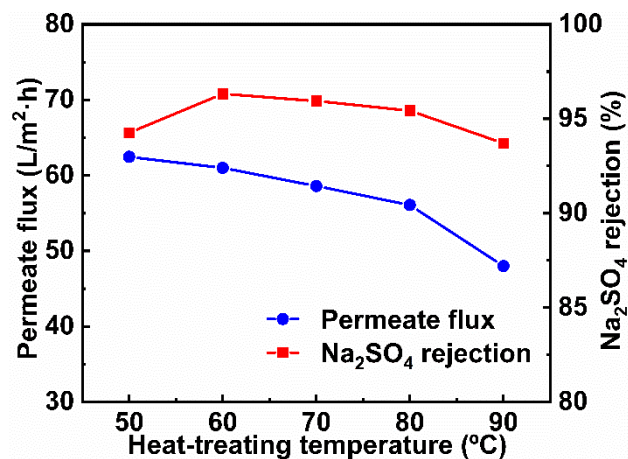

102

103 **Fig. S7** Effect of heat treatment temperature on NF membrane performance

#### 104 **1.8 Effect of heat treatment time**

105 Effect of heat treatment time on NF membrane separation performance was  
106 investigated when Mg-Fe LDH concentration was fixed at 0.1 wt%, PIP concentration  
107 was 0.3 wt%, TMC concentration was 0.15 wt%, and the heat treatment temperature  
108 was 60°C. As it can be seen from Fig.S8, with the increase of heat treatment time the  
109 rejection rate of Na<sub>2</sub>SO<sub>4</sub> increased firstly and then decreased. However, accompanied  
110 by the change of rejection rate, the permeation flux presented an opposite change  
111 trend. The heat treatment process will accelerate the interface polymerization reaction  
112 speed. If the heat treatment time was less than 15 min, with heat treatment time

113 prolonging, PIP and TMC will be crosslinked further, which lead the formed selective  
114 functional layer denser. As a result, the membrane permeation flux decreased and the  
115 salt rejection rate increased. However, as the heat treatment time continues to increase,  
116 some cracks and defects will appear in the selective functional layer due to the  
117 expansion coefficients of the selective layer and the support layer being different,  
118 which contributed to the increase of permeation flux and the decrease the rejection  
119 rate. Considering the permeate flux and rejection rate of the NF membrane, the heat  
120 treatment time was fixed at 10 min.

121

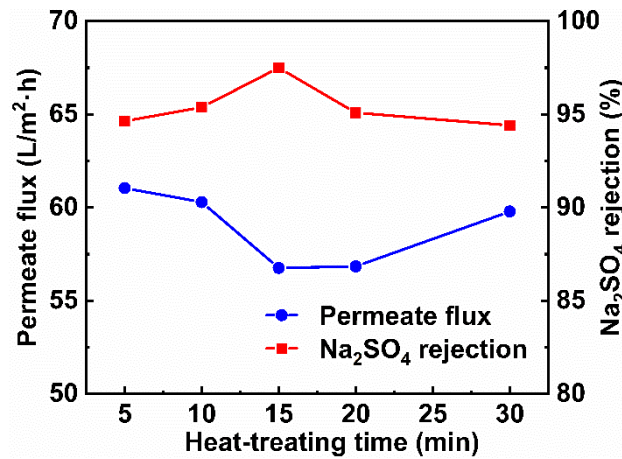

122

123 **Fig. S8** Effect of heat treatment time on Mg-Fe LDH modified NF membrane.

124

125

126

127

128

129

130

131

132

133

134



135  
136  
137  
138  
139  
140

**Table S1** Preparation conditions of different NF membrane

| Membrane | LDH (wt%) | PIP (wt%) | TMC (wt%) | Heat treatment temperature (°C) | Heat treatment time (min) |
|----------|-----------|-----------|-----------|---------------------------------|---------------------------|
| PA-0     | 0         | 0.3       | 0.15      | 60                              | 10                        |
| PA-1     | 0.05      | 0.3       | 0.15      | 60                              | 10                        |
| PA-2     | 0.1       | 0.3       | 0.15      | 60                              | 10                        |
| PA-3     | 0.15      | 0.3       | 0.15      | 60                              | 10                        |
| PA-4     | 0.2       | 0.3       | 0.15      | 60                              | 10                        |

141  
142  
143  
144  
145

**Table S2** The molecular weight and molecular radius of PEG

| Solute   | Molecular Weight | $r_s$ |
|----------|------------------|-------|
| PEG-200  | 200.00           | 0.64  |
| PEG-400  | 400.00           | 0.94  |
| PEG-600  | 600.00           | 1.18  |
| PEG-800  | 800.00           | 1.38  |
| PEG-1000 | 1000.00          | 1.56  |

146  
147  
148  
149  
150  
151  
152  
153

154  
155  
156  
157  
158

**Table S3** Surface chemical compositions of different NF membranes

| Membrane | Surface chemical compositions<br>(At.%) |       |       |      |      |
|----------|-----------------------------------------|-------|-------|------|------|
|          | C                                       | O     | N     | Mg   | Fe   |
| PA-0     | 73.70                                   | 13.27 | 13.04 | -    | -    |
| PA-2     | 70.37                                   | 16.17 | 11.57 | 1.42 | 0.47 |
| PA-4     | 60.09                                   | 22.48 | 11.63 | 4.34 | 1.46 |

159  
160  
161  
162

**Table S4** Roughness of different NF membranes

| Membranes | Ra (nm) | RMS (nm) |
|-----------|---------|----------|
| PA-0      | 4.99    | 6.58     |
| PA-2      | 2.94    | 3.71     |
| PA-4      | 2.43    | 2.98     |

163  
164  
165  
166

**Table S5** Characteristic parameters of different membranes

| Membrane | PWP ( $L \cdot m^{-2} \cdot h^{-1}$ ) | MWCO (Da) | $\mu_p$ (nm) | $\rho_p$ |
|----------|---------------------------------------|-----------|--------------|----------|
| PSF      | 800                                   | 50,000    | 3            | -        |
| PA-0     | $30.1 \pm 0.3$                        | 281       | 0.415        | 1.53     |
| PA-2     | $70.4 \pm 1.1$                        | 385       | 0.493        | 1.69     |
| PA-4     | $80.8 \pm 0.4$                        | 597       | 0.559        | 1.75     |

167

168

169

170

**Table S6** Property comparison of different nanomaterial-modified NF membrane

|    | Nanomaterials        | Reactive monomer | Flux ( $L \cdot m^{-2} \cdot h^{-1} \cdot bar^{-1}$ ) | Rejection rate (%) | Contaminant                     | Reference |
|----|----------------------|------------------|-------------------------------------------------------|--------------------|---------------------------------|-----------|
| 1  | ODA-h-NCs            | PIP/TMC          | 8.97                                                  | 95.8               | Na <sub>2</sub> SO <sub>4</sub> | [4]       |
| 2  | AgNPs                | MPD/TMC          | 10.4                                                  | 97.7               | Na <sub>2</sub> SO <sub>4</sub> | [5]       |
| 3  | MWCNTs-OH            | PIP/TMC          | 6.9                                                   | 97.6               | Na <sub>2</sub> SO <sub>4</sub> | [6]       |
| 4  | O-MoS <sub>2</sub>   | PIP/TMC          | 7.91                                                  | 97.9               | Na <sub>2</sub> SO <sub>4</sub> | [7]       |
| 5  | rGO/TiO <sub>2</sub> | PIP/TMC          | 6.0                                                   | 93.6               | Na <sub>2</sub> SO <sub>4</sub> | [8]       |
| 6  | r-GO                 | PIP/TMC          | 6.6                                                   | 98.5               | Na <sub>2</sub> SO <sub>4</sub> | [9]       |
| 7  | GO                   | PIP/TMC          | 10.4                                                  | 94.6               | Na <sub>2</sub> SO <sub>4</sub> | [10]      |
| 8  | GO/MWCNTs            | PIP/TMC          | 13.9                                                  | 94.0               | Na <sub>2</sub> SO <sub>4</sub> | [10]      |
| 9  | Blank                | PIP/TMC          | 5.7                                                   | 98.9               | Na <sub>2</sub> SO <sub>4</sub> | This work |
| 10 | Mg-Fe LDH            | PIP/TMC          | 15.2                                                  | 96.4               | Na <sub>2</sub> SO <sub>4</sub> | This work |

171

172

---

## References

- 173 [1] Lau W J, Ismail A F, Misdan N et al (2012) A recent progress in thin film  
174 composite membrane: A review. *Desalination* 190-199.
- 175 [2] Wang Q, Zhang G S, Li Z S et al (2014) Preparation and properties of  
176 polyamide/titania composite nanofiltration membrane by interfacial polymerization.  
177 *Desalination* 38-44.
- 178 [3] Tian X, Wang J, Zhang H et al (2018) Establishment of transport channels with  
179 carriers for water in reverse osmosis membrane by incorporating hydrotalcite into the  
180 polyamide layer. *RSC Advances* 12439-12448.
- 181 [4] Istirokhatun T, Lin Y Q, Shen Q, Guan K C, Wang S Y, Matsuyama H. Ag-  
182 based nanocapsule-regulated interfacial polymerization Enables synchronous  
183 nanostructure towards high-performance nanofiltration membrane for sustainable  
184 water remediation. *Journal of Membrane Science*, 2022, 645:120196-120205.
- 185 [5] Xue S M, Xu Z L, Tang Y J, Ji C H. Polypiperazine-amide nanofiltration  
186 membrane modified by different functionalized multiwalled carbon nanotubes  
187 (MWCNTs), *ACS Applied Materials & Interfaces*, 2016, 8(29): 19135-19144.
- 188 [6] Yang S S, Jiang Q L, Zhang K S. Few-layers 2D O-MoS<sub>2</sub> TFN nanofiltration  
189 membranes for future desalination. *Journal of Membrane Science*, 2020, 604:118052-  
190 118063.
- 191 [7] Chen X Y, Feng Z H, Gohil J, Stafford C M, Dai N, Huang L, Lin H Q.  
192 Reduced holey graphene oxide membranes for desalination with improved water  
193 permeance. *Acs Applied Materials & Interfaces*, 2020, 12, (1), 1387-1394.
- 194 [8] Safarpour M, Vatanpour V, Khataee A, Esmaeili M. Development of a novel  
195 high flux and fouling-resistant thin film composite nanofiltration membrane by  
196 embedding reduced graphene oxide/TiO<sub>2</sub>, *Separation and Purification Technology*,  
197 2015, 154: 96-107.
- 198 [9] Chen X Y, Feng Z H, Gohil J, Stafford C M, Dai N, Huang L, Lin H Q.  
199 Reduced holey graphene oxide membranes for desalination with improved water  
200 permeance. *Acs Applied Materials & Interfaces*, 2020, 12, (1), 1387-1394.
- 201 [10] Tian X, Wang J, Zhang H, Cao Z, Zhao M, Guan Y, Zhang Y. Establishment  
202 of transport channels with carriers for water in reverse osmosis membrane by  
203 incorporating hydrotalcite into the polyamide layer, *RSC Advances*, 2018, 8(22):  
204 12439-12448.
